# Supplementary material for: Synthesis, characterization and electrochemical performance of Li2FeSiO4/C for lithium-ion batteries
Source: Royal Society of Chemistry journal article supplement (doi:10.1039/c2ra21875e), 2012-11-06
Supplement: c2ra21875e.pdf [file c2ra21875e.pdf]

# Synthesis, Characterization and Electrochemical Performance of $\text{Li}_2\text{FeSiO}_4/\text{C}$ for Lithium-Ion Battery

Weihua Chen<sup>\*a</sup>, Meng Lan<sup>a</sup>, Dan Zhu<sup>a</sup>, Cuilian Wang<sup>a</sup>, Shangru Xue<sup>a</sup>, Changchun Yang<sup>a</sup>, Zexian Li<sup>a</sup>, Jianmin Zhang<sup>\*a</sup> and Liwei Mi<sup>\*b</sup>

<sup>a</sup>College of Chemistry and Molecular Engineering, Zhengzhou University, Zhengzhou, 450001, P. R. China. Fax: +86-371-67781556; Tel: +86-371-67781539; E-mail: chenweih@zzu.edu.cn, zhjm@zzu.edu.cn

<sup>b</sup>Key Laboratory for Micro-Nano Energy Storage and Conversion Materials of Henan Province, Institute of Surface Micro and Nano Materials, Xuchang University, Henan 461000, P. R. China. Fax: +86-374-2968784; Tel: +86-374-2968784; E-mail: zzheng@xcu.edu.cn

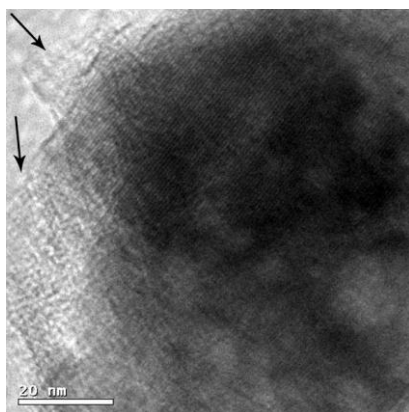

Figure S1. The TEM image of as-synthesized  $\text{Li}_2\text{FeSiO}_4/\text{C}$ .
